# Supplementary material for: Microglia Negatively Regulate the Proliferation and Neuronal Differentiation of Neural Stem/Progenitor Cells Isolated from Poststroke Mouse Brains
Source: MDPI journal article supplement (doi:10.3390/cells12162040), 2023-08-10
Supplement: s1 [file s1]

# Supplementary Figure S1

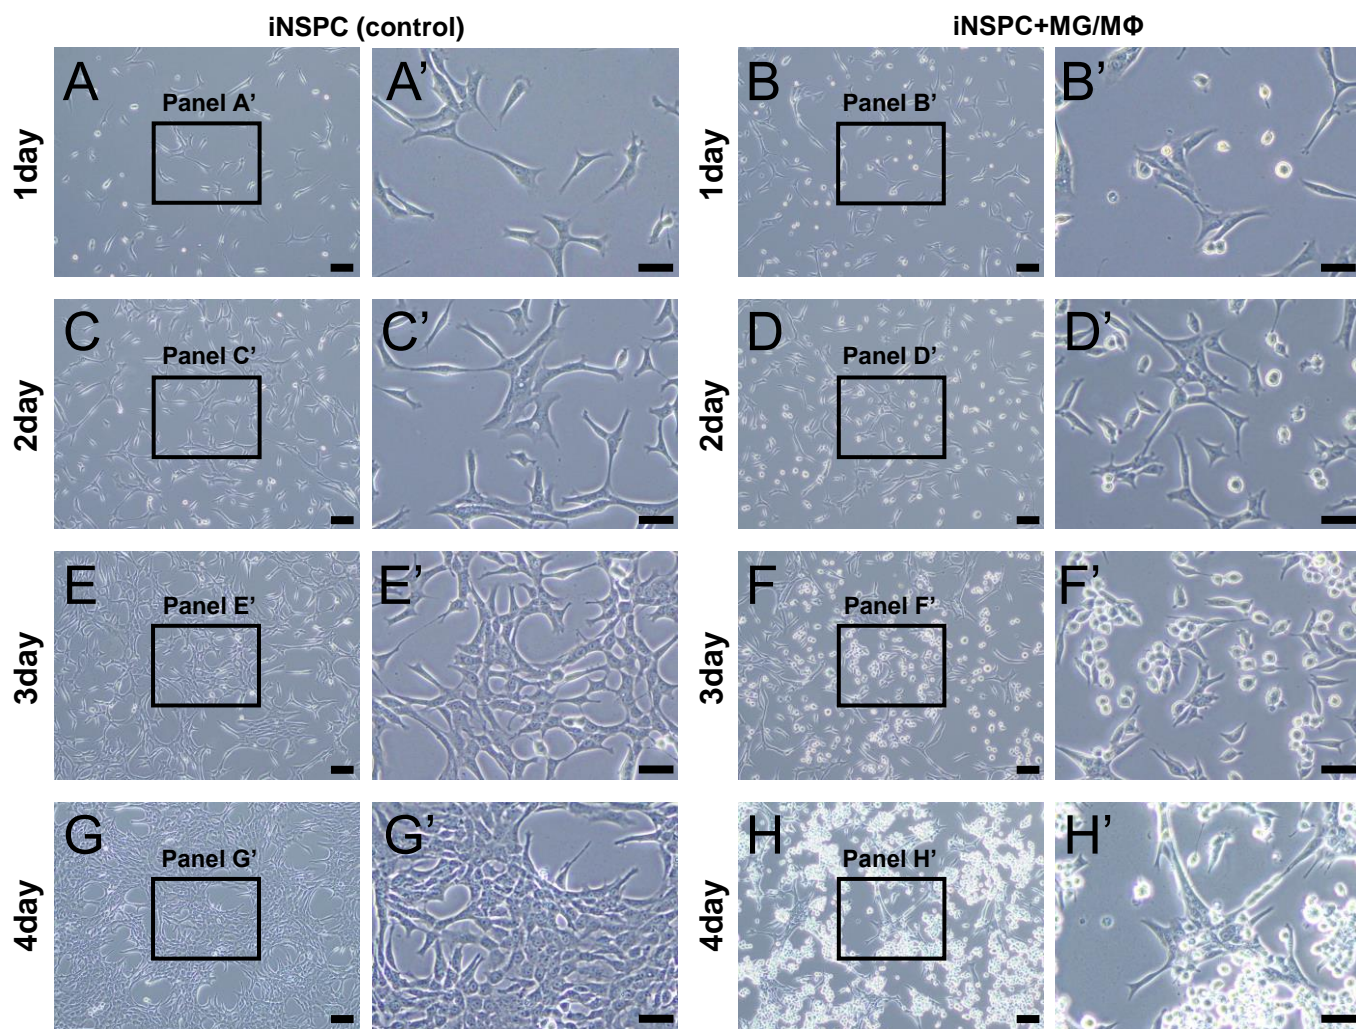

# Supplementary Figure S2

A

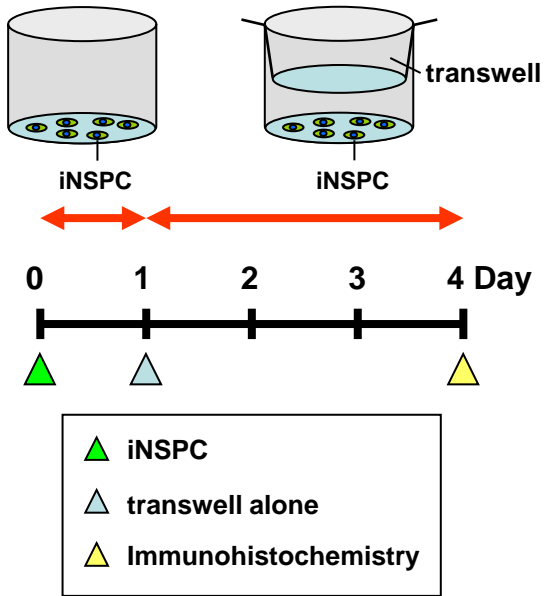

B

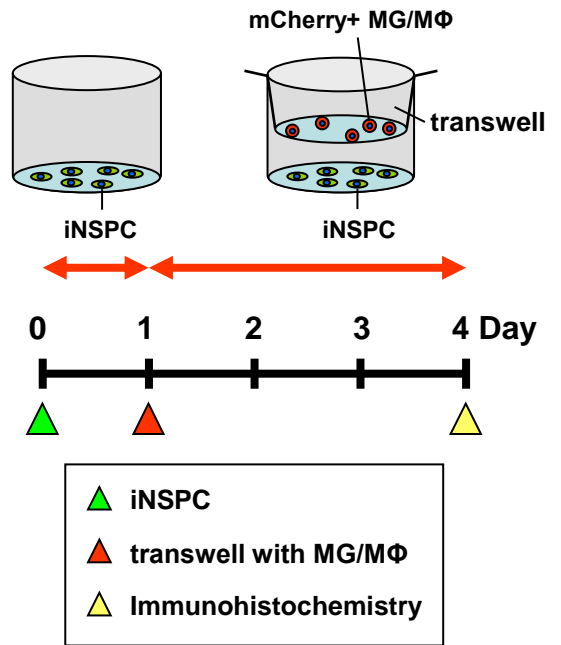

C

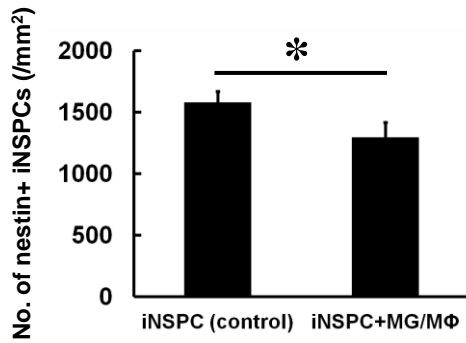

# Supplementary Figure S3

A

GFP+ Neurospheres

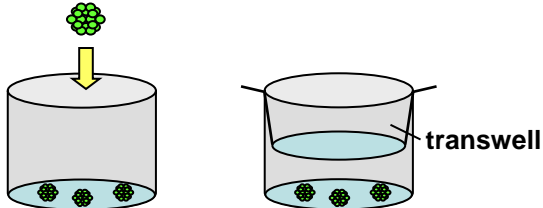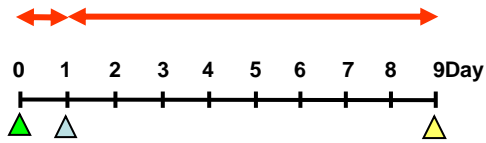

- ▲ iNSPC-derived spheres
- ▲ transwell alone
- ▲ Immunohistochemistry

B

GFP+ Neurospheres

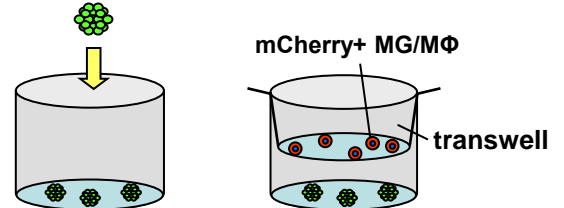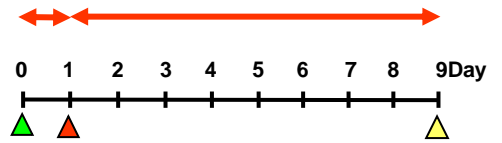

- ▲ iNSPC-derived spheres
- ▲ transwell with MG/MΦ
- ▲ Immunohistochemistry

C

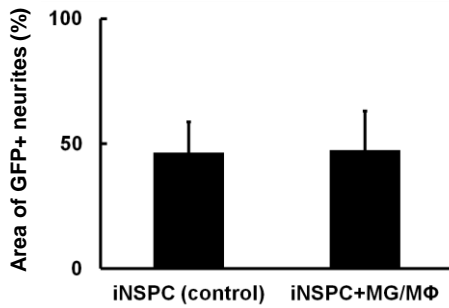

# Supplementary Figure S4

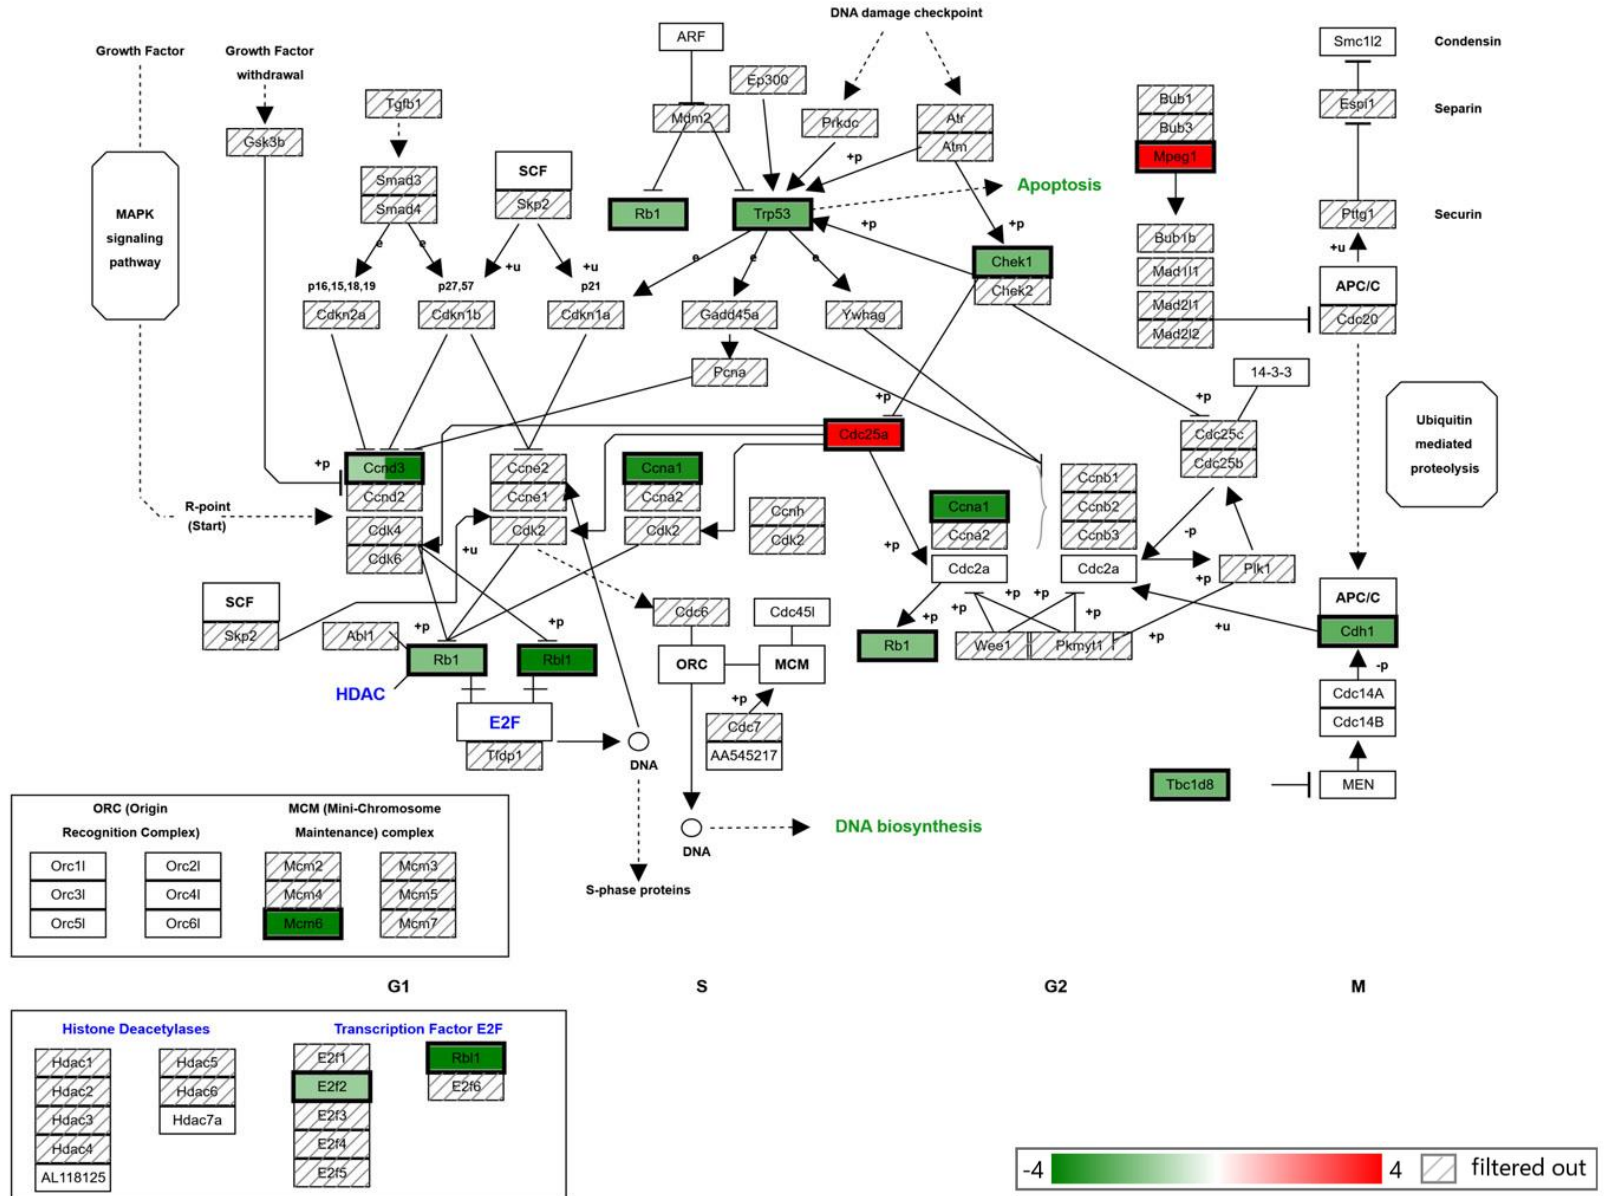

## Supplementary Figure S5

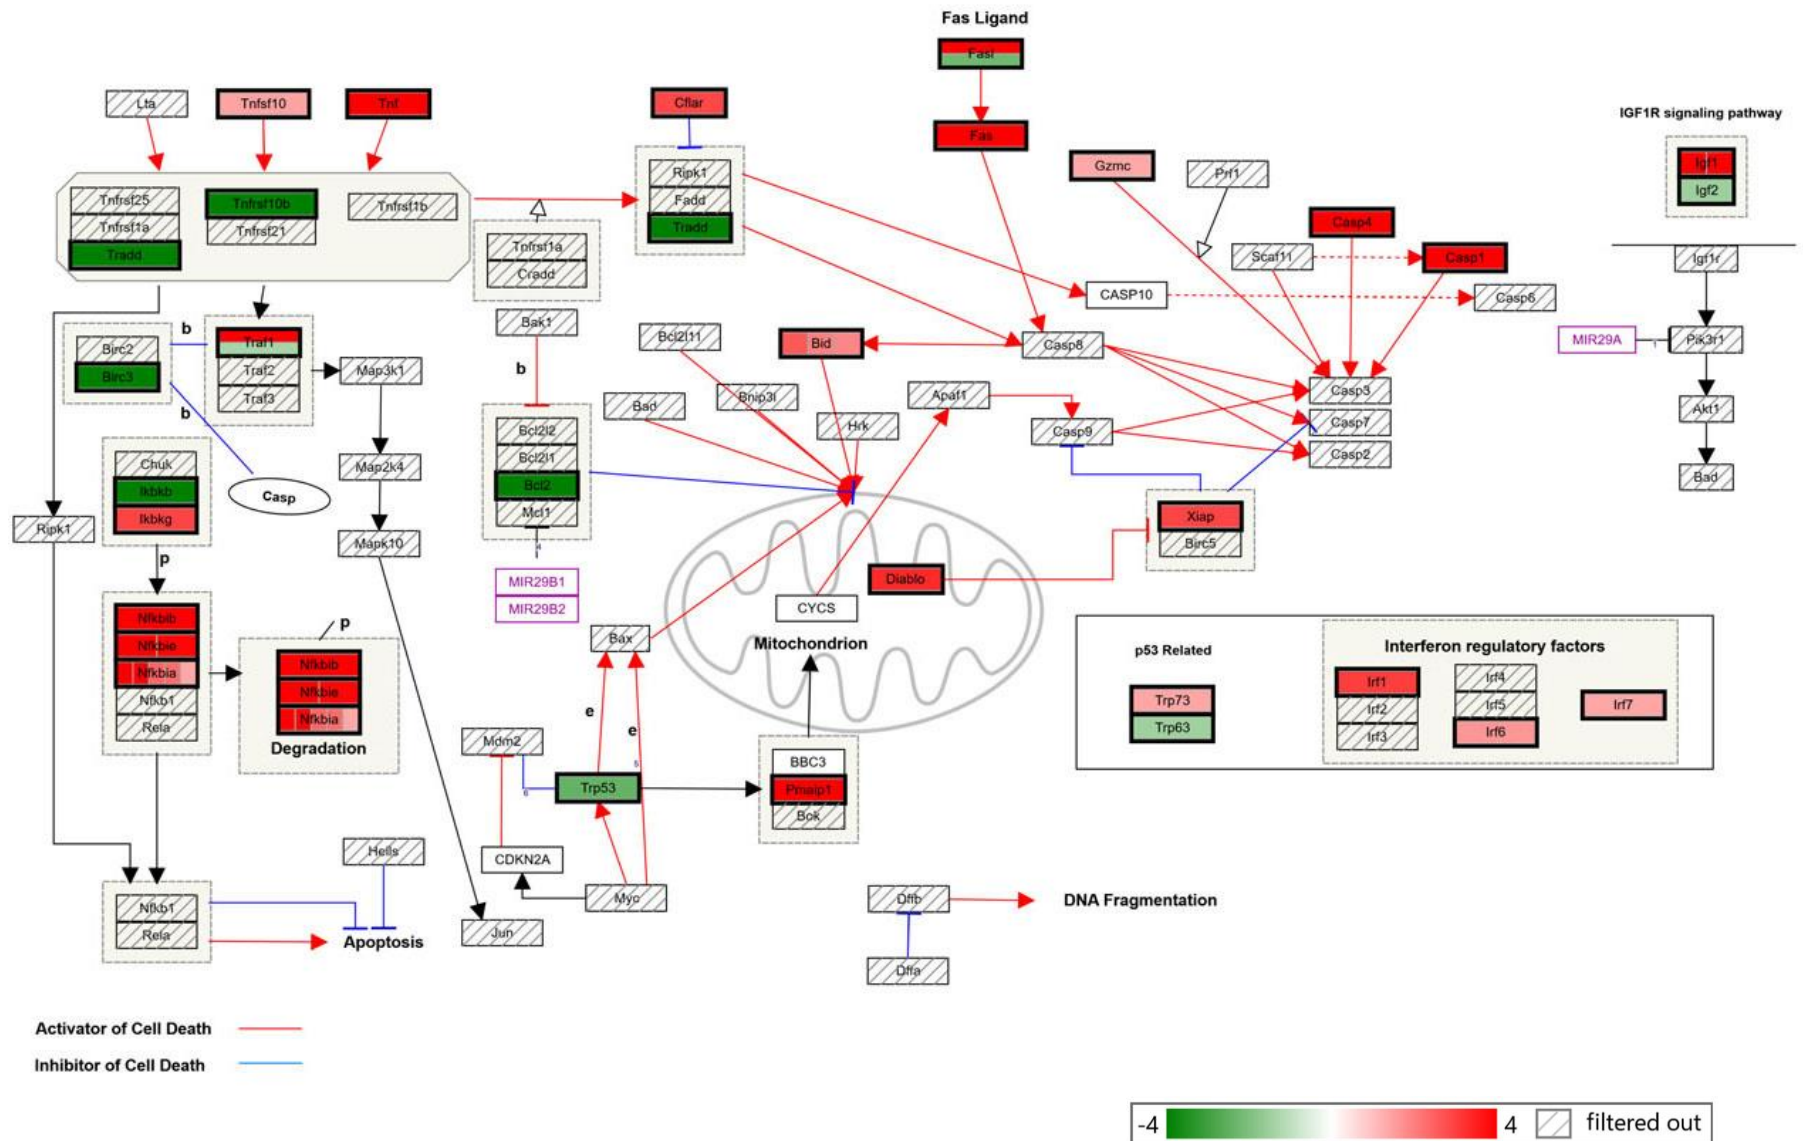

## Supplementary Table S1

**Comparison of cell cycle-related gene expression between iNSPCs co-incubated with MGs/MΦs and iNSPCs alone (iNSPCs with MGs/MΦs relative to iNSPCs alone)**

| Gene symbol | Gene name                                                                                           | ID           | Fold change |
|-------------|-----------------------------------------------------------------------------------------------------|--------------|-------------|
| Ccna1       | cyclin A1                                                                                           | 1449177_at   | -3.7        |
| Ccnd3       | cyclin D3                                                                                           | 1444323_at   | -4.18       |
| Cdc25a      | cell division cycle 25A                                                                             | 1445995_at   | 4.87        |
| Cdh1        | cadherin 1                                                                                          | 1448261_at   | -2.89       |
| Chk1        | checkpoint kinase 1                                                                                 | 1420032_at   | -2.65       |
| E2f2        | E2F transcription factor 2                                                                          | 1436434_at   | -2.16       |
| Mcm6        | minichromosome maintenance deficient 6<br>(MIS5 homolog, <i>S. pombe</i> ) ( <i>S. cerevisiae</i> ) | 1447756_x_at | -14.6       |
| Mpeg1       | macrophage expressed gene 1                                                                         | 1427076_at   | 20.77       |
| Rb1         | retinoblastoma 1                                                                                    | 1444400_at   | -2.45       |
| Rbl1        | retinoblastoma-like 1 (p107)                                                                        | 1454293_at   | -4.18       |
| Tbc1d8      | TBC1 domain family, member 8                                                                        | 1455683_a_at | -2.65       |
| Trp53       | transformation related protein 53                                                                   | 1459781_x_at | -2.79       |



## Supplementary Table S2

**Comparison of cell cycle-related gene expression between iNSPCs co-incubated with MGs/MΦs and iNSPCs alone (iNSPCs with MGs/MΦs relative to iNSPCs alone)**

| Gene symbol | Gene name                                                                           | ID           | Fold change |
|-------------|-------------------------------------------------------------------------------------|--------------|-------------|
| Bcl2        | B cell leukemia/lymphoma 2                                                          | 1440770_at   | -4.79       |
| Bid         | BH3 interacting domain death agonist                                                | 1417045_at   | 2.95        |
| Bid         | BH3 interacting domain death agonist                                                | 1448560_at   | 2.49        |
| Bid         | BH3 interacting domain death agonist                                                | 1447873_x_at | 2.43        |
| Birc3       | baculoviral IAP repeat-containing 3                                                 | 1425223_at   | -5.05       |
| Casp1       | caspase 1                                                                           | 1449265_at   | 4.07        |
| Casp4       | caspase 4, apoptosis-related cysteine peptidase                                     | 1449591_at   | 5.75        |
| Cflar       | CASP8 and FADD-like apoptosis regulator                                             | 1453482_at   | 3.16        |
| Diablo      | diablo homolog (Drosophila)                                                         | 1425768_at   | 3.51        |
| Fas         | Fas (TNF receptor superfamily member 6)                                             | 1460251_at   | 4.75        |
| Fasl        | Fas ligand (TNF superfamily, member 6)                                              | 1418803_a_at | 4.66        |
| Fasl        | Fas ligand (TNF superfamily, member 6)                                              | 1449235_at   | -2.66       |
| Gzmc        | granzyme C                                                                          | 1421256_at   | 2.02        |
| Igf1        | insulin-like growth factor 1                                                        | 1419519_at   | 8.51        |
| Igf1        | insulin-like growth factor 1                                                        | 1434413_at   | 7.01        |
| Igf2        | insulin-like growth factor 2                                                        | 1448152_at   | -2.12       |
| Ikbkb       | inhibitor of kappaB kinase beta                                                     | 1445141_at   | -9.33       |
| Ikbkg       | inhibitor of kappaB kinase gamma                                                    | 1435647_at   | 3.2         |
| Irf1        | interferon regulatory factor 1                                                      | 1448436_a_at | 3.27        |
| Irf6        | interferon regulatory factor 6                                                      | 1418301_at   | 2.23        |
| Irf7        | interferon regulatory factor 7                                                      | 1417244_a_at | 2.04        |
| Nfkbia      | nuclear factor of kappa light polypeptide gene enhancer in B cells inhibitor, alpha | 1420088_at   | 2.73        |
| Nfkbia      | nuclear factor of kappa light polypeptide gene enhancer in B cells inhibitor, alpha | 1420089_at   | 2.02        |
| Nfkbia      | nuclear factor of kappa light polypeptide gene enhancer in B cells inhibitor, alpha | 1448306_at   | 4.01        |
| Nfkbia      | nuclear factor of kappa light polypeptide gene enhancer in B cells inhibitor, alpha | 1449731_s_at | 4.33        |

|           |                                                                                                                |              |       |
|-----------|----------------------------------------------------------------------------------------------------------------|--------------|-------|
| Nfkbia    | nuclear factor of kappa light polypeptide gene enhancer<br>in B cells inhibitor, alpha                         | 1438157_s_at | 2.79  |
| Nfkbib    | nuclear factor of kappa light polypeptide gene enhancer<br>in B cells inhibitor, beta                          | 1446718_at   | 8.73  |
| Nfkbie    | nuclear factor of kappa light polypeptide gene enhancer<br>in B cells inhibitor, epsilon                       | 1431843_a_at | 3.93  |
| Nfkbie    | nuclear factor of kappa light polypeptide gene enhancer<br>in B cells inhibitor, epsilon                       | 1458299_s_at | 4.37  |
| Pmaip1    | phorbol-12-myristate-13-acetate-induced protein 1                                                              | 1418203_at   | 16.05 |
| Tnf       | tumor necrosis factor                                                                                          | 1419607_at   | 4.85  |
| Tnfrsf10b | tumor necrosis factor receptor superfamily, member 10b                                                         | 1421296_at   | -4.45 |
| Tnfrsf10  | tumor necrosis factor (ligand) superfamily, member 10                                                          | 1439680_at   | 2.09  |
| Tradd     | Tumor necrosis factor receptor type 1-associated DEATH<br>domain protein; TNFRSF1A-associated via death domain | 1439910_a_at | -6.2  |
| Traf1     | TNF receptor-associated factor 1                                                                               | 1423602_at   | 10.19 |
| Traf1     | TNF receptor-associated factor 1                                                                               | 1445452_at   | -2.01 |
| Trp53     | transformation related protein 53                                                                              | 1459781_x_at | -2.79 |
| Trp63     | transformation related protein 63                                                                              | 1459581_at   | -2.1  |
| Trp73     | transformation related protein 73                                                                              | 1427697_a_at | 2.04  |
| Xiap      | X-linked inhibitor of apoptosis                                                                                | 1453385_at   | 3.19  |



## Supplementary Figure legends

### Figure S1

(A, C, E, G, A', C', E', G') Phase-contrast images showing the morphology of iNSPCs cultured alone and in combination with MGs/MΦs for 1 (A, A'), 2 (C, C'), 3 (E, E'), and 4 (G, G') days. (B, B', D, D', F, F', H, H') Phase-contrast images showing the morphology of iNSPCs cocultured with MGs/MΦs for 1 (B, B'), 2 (D, D'), 3 (F, F'), and 4 (H, H') days. Scale bar, 50 μm (A–H, A'–H'). Abbreviations: iNSPC, injury/ischemia-induced neural stem/progenitor cell; MG/MΦ, microglial cell/macrophage.

### Figure S2

(A–C) Evaluation of iNSPC proliferation in monoculture (A) and coculture with mCherry<sup>+</sup> MG/MΦs under indirect cell–cell contact using transwell inserts (B). The number of nestin<sup>+</sup> iNSPCs (mCherry<sup>−</sup>/nestin<sup>+</sup> cells) is significantly lower in the presence of MG/MΦs (iNSPC + MG/MΦs group) compared to the iNSPC monoculture (control) (C). \*p < 0.05 compared to iNSPC (control); C, n = 3 (12 data points) per group. Abbreviations: iNSPC, injury/ischemia-induced neural stem/progenitor cell; MG/MΦ, microglial cell/macrophage.

### Figure S3

(A–C) Evaluation of the differentiation potential of iNSPCs under indirect cell–cell contact using transwell inserts. GFP<sup>+</sup> iNSPC-derived neurospheres are incubated alone (control) (A) or coincubated with mCherry<sup>+</sup> MGs/MΦs (iNSPC + MG/MΦ) (B). The GFP<sup>+</sup> neurites area is not significantly different between the two groups. C, n = 12 for iNSPC (control), n = 14 for iNSPC + MG/MΦ. Abbreviations: GFP, green fluorescent protein; iNSPC, injury/ischemia-induced neural stem/progenitor cell; MG/MΦ, microglial cell/macrophage.

### Figure S4

Pathway analysis of cell cycle-related genes in iNSPCs monocultures and iNSPCs cocultured with MGs/MΦs.

**Figure S5**

Pathway analysis of apoptosis-related genes in iNSPCs monocultures and iNSPCs cocultured with MGs/MΦs.

**Supplementary Table S1**

Comparison of cell cycle-related gene expression between iNSPCs with MGs/MΦs and iNSPCs alone (iNSPCs with MGs/MΦs relative to iNSPCs alone).

**Supplementary Table S2**

Comparison of apoptosis-related gene expression between iNSPCs with MGs/MΦs and iNSPCs alone (iNSPCs with MGs/MΦs relative to iNSPCs alone).
